# Supplementary material for: A benchmark for RNA-seq deconvolution analysis under dynamic testing environments
Source: PubMed Central journal article supplement (PMC8042713; doi:10.1186/s13059-021-02290-6), 2021-04-12
Supplement: 13059_2021_2290_MOESM1_ESM.pdf [file 13059_2021_2290_MOESM1_ESM.pdf]

## Supplementary Figures

Figure S1 - Outline of benchmarking framework Sim1

Figure S2 - Outline of benchmarking framework Sim2 and Sim3

Figure S3 - Correlation heatmaps of Sim1\_simModel

Figure S4 - mAD heatmaps of sim1\_simModel

Figure S5 - Evaluation results of sim1\_simModel based on mAD

Figure S6 - Variance analysis of GSE60424

Figure S7 - Variance analysis of GSE113590

Figure S8 - Scatter plots of simulated profiles in Sim1\_simModel

Figure S9 - Mean-variance plots of simulations in Sim1\_simModel

Figure S10 - Density plots of CV values in Sim1\_simModel

Figure S11 - Evaluation results of Sim1\_libSize based on mAD

Figure S12 - Evaluation results of Sim2 based on mAD

Figure S13 - Cell-type-specific evaluation heatmaps of Sim2 based on correlation

Figure S14 - Cell-type-specific evaluation heatmaps of Sim2 based on mAD

Figure S15 - Scatter plots of estimated weights vs. ground truths of mixtures with 10 cellular components.

Figure S16 - Summarized mAD heatmaps of Sim3

Figure S17 - Summarized evaluation heatmaps of Sim3 in the relative scale

Figures S18 - Summarized evaluation heatmaps of Sim3 in the absolute scale

**a** Sim1 - simModel

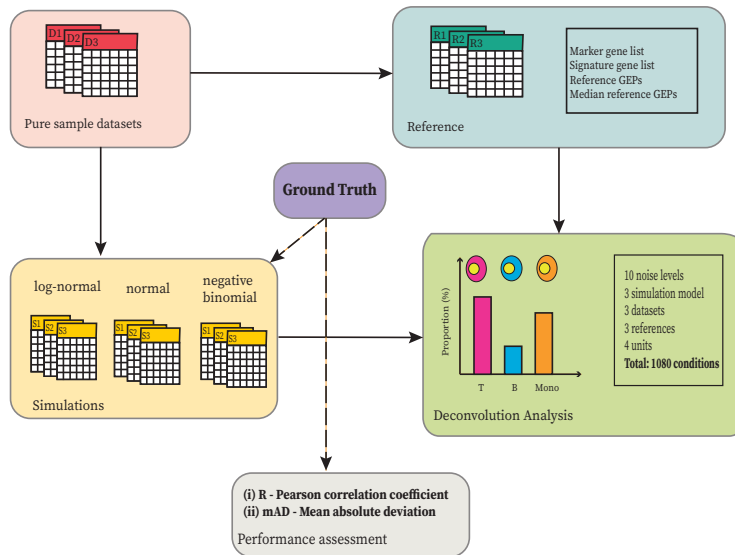

**b** Sim1 - libSize

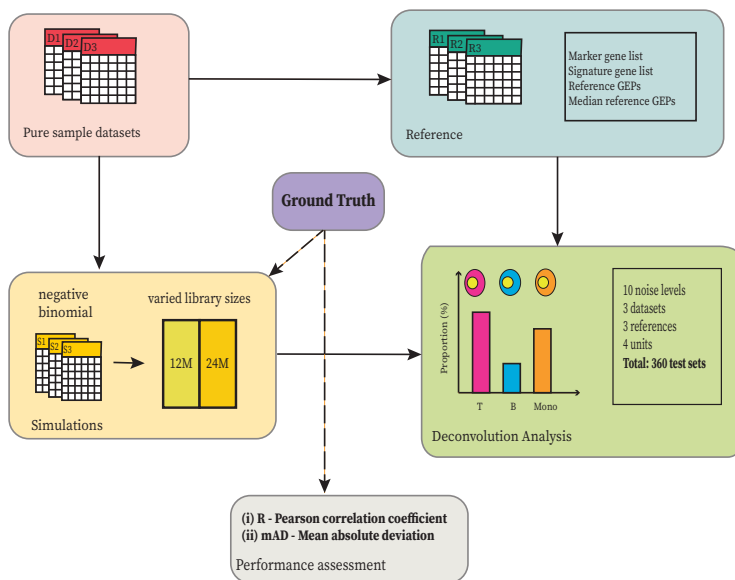

**Figure S1| Outline of benchmarking framework Sim1**

**a**, Outline of benchmarking framework Sim1\_simModel. **b**, Outline of benchmarking framework Sim1\_libSize

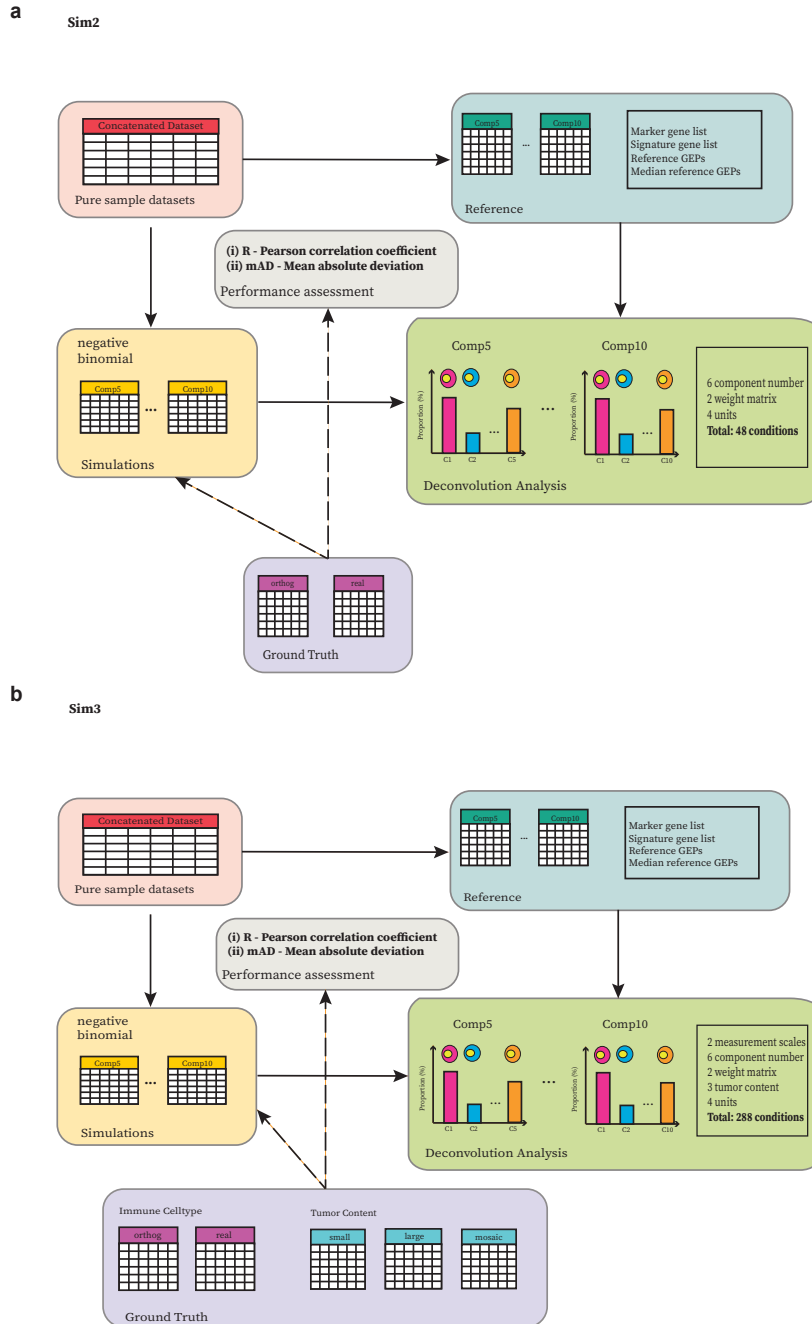

**Figure S2| Outline of benchmark frameworks Sim2 and Sim3**

**a**, Outline of benchmarking framework Sim2. **b**, Outline of benchmarking framework Sim3.

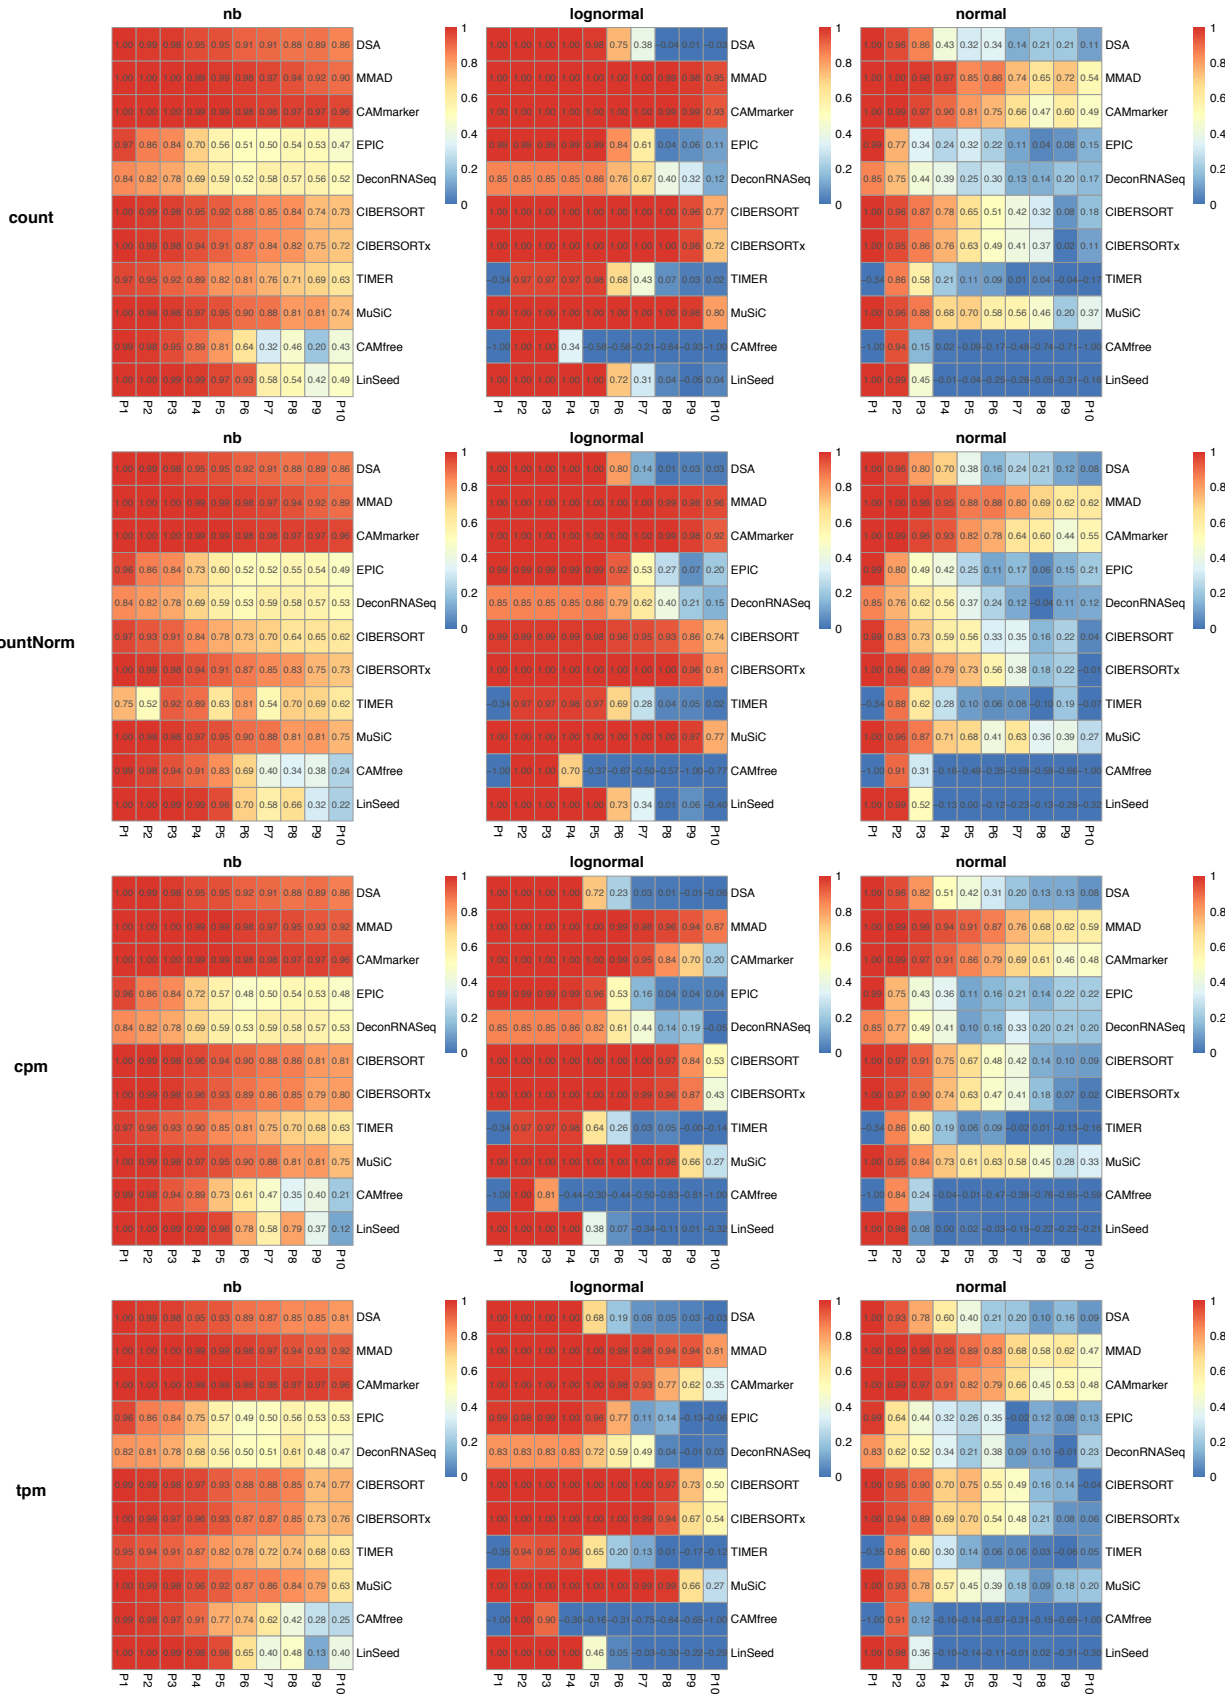

### **Figure S3| Correlation heatmaps of sim1\_simModel**

The deconvolution results of Sim1\_simModel are organized by 12 heatmaps where each row panel refers to the results derived from the same quantification unit and column panel refers to the results derived from the same simulation model. In each heatmap, row indexes refer to the results derived from the same simulation model. In each heatmap, row indexes refer to the deconvolution methods and column indexes refer to the noise levels. Each cell in the heatmap indicates averaged correlations of 9 testing sets (3 mixture sets  $\times$  3 reference sets)(Methods).

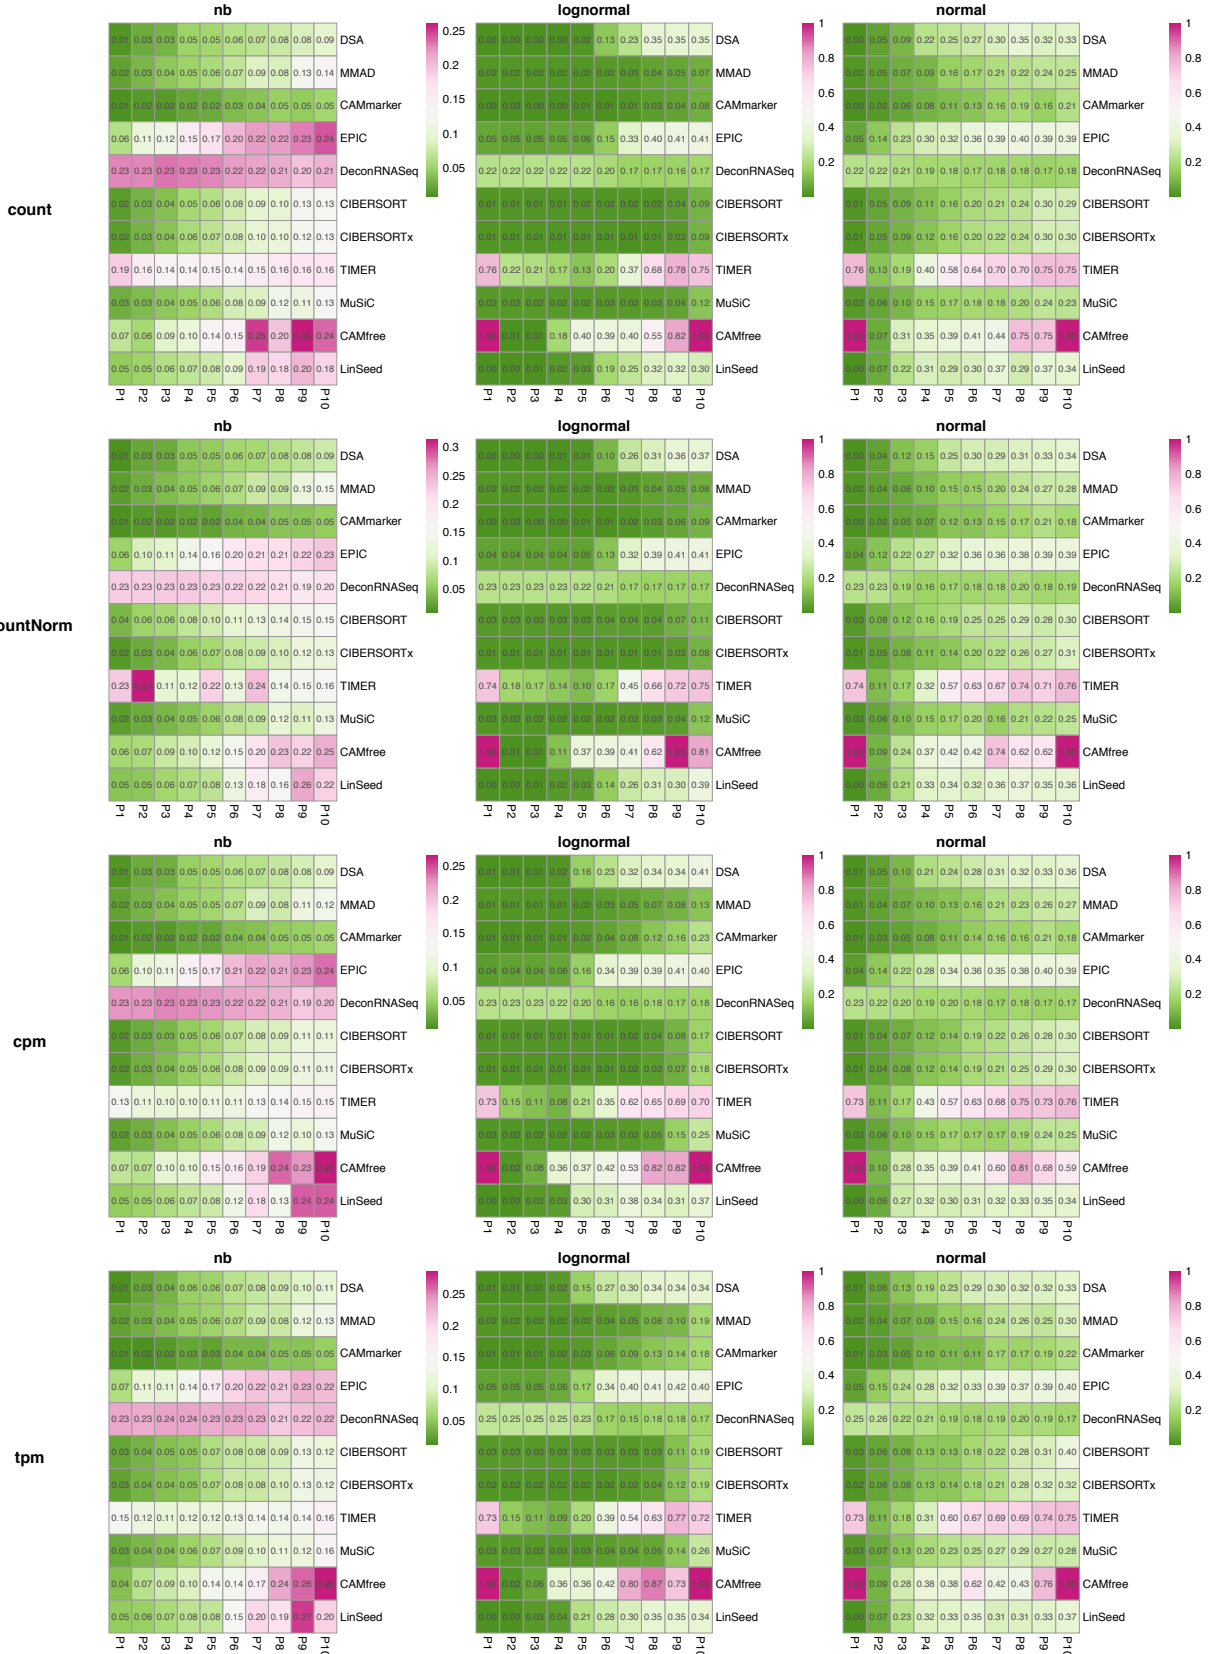

### **Figure S4| mAD heatmaps of sim1\_simModel**

The deconvolution results of Sim1\_simModel are organized by 12 heatmaps where each row panel refers to the results derived from the same quantification unit and each column panel refers to the results derived from the same simulation model. In each heatmap, row indexes refer to the results derived from the same simulation model. In each heatmap, row indexes refer to the tested deconvolution methods and column indexes refer to the noise levels. Each cell in the heatmap indicates averaged mADs of 9 testing sets (3 mixture sets  $\times$  3 reference sets)(Methods).

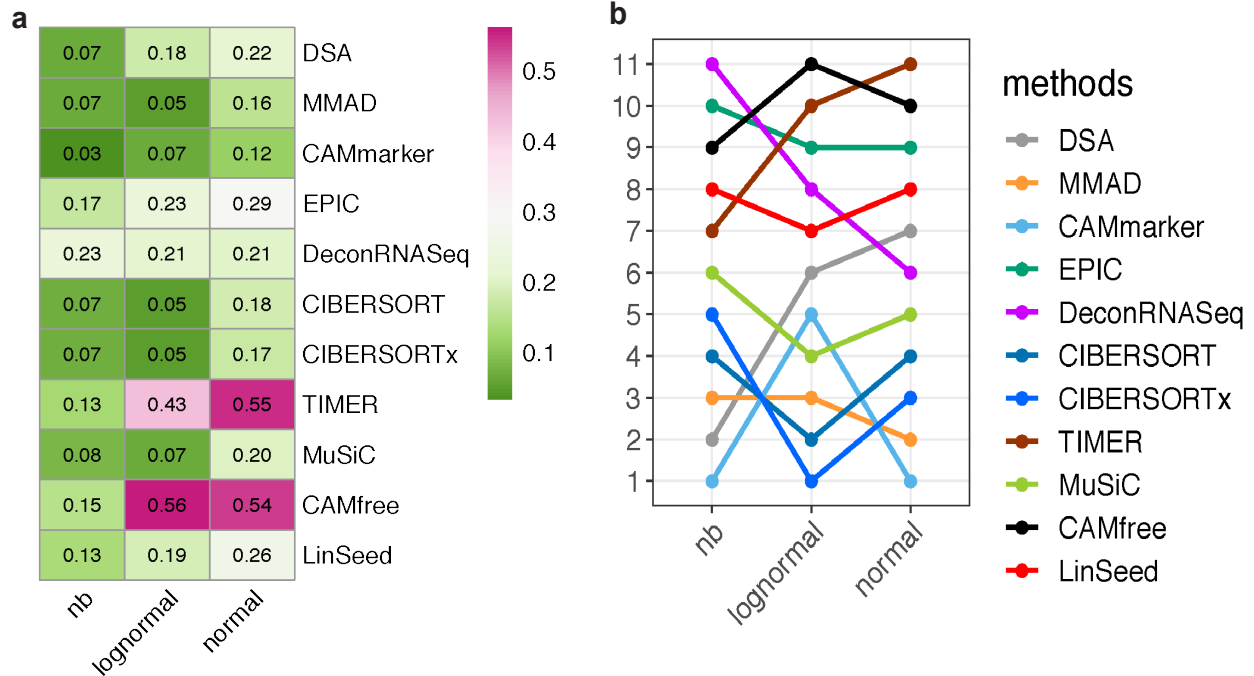

**Figure S5| Evaluation results of sim1\_simModel based on mAD**

**a**, Heatmap of summarized evaluation results based on the mADs and **b**, rankings of tested deconvolution methods. In each heatmap, row indexes refer to the tested methods and column indexes refer to the simulation models (negative binomial, log-normal, and normal).



## Variance Structure of GSE60424

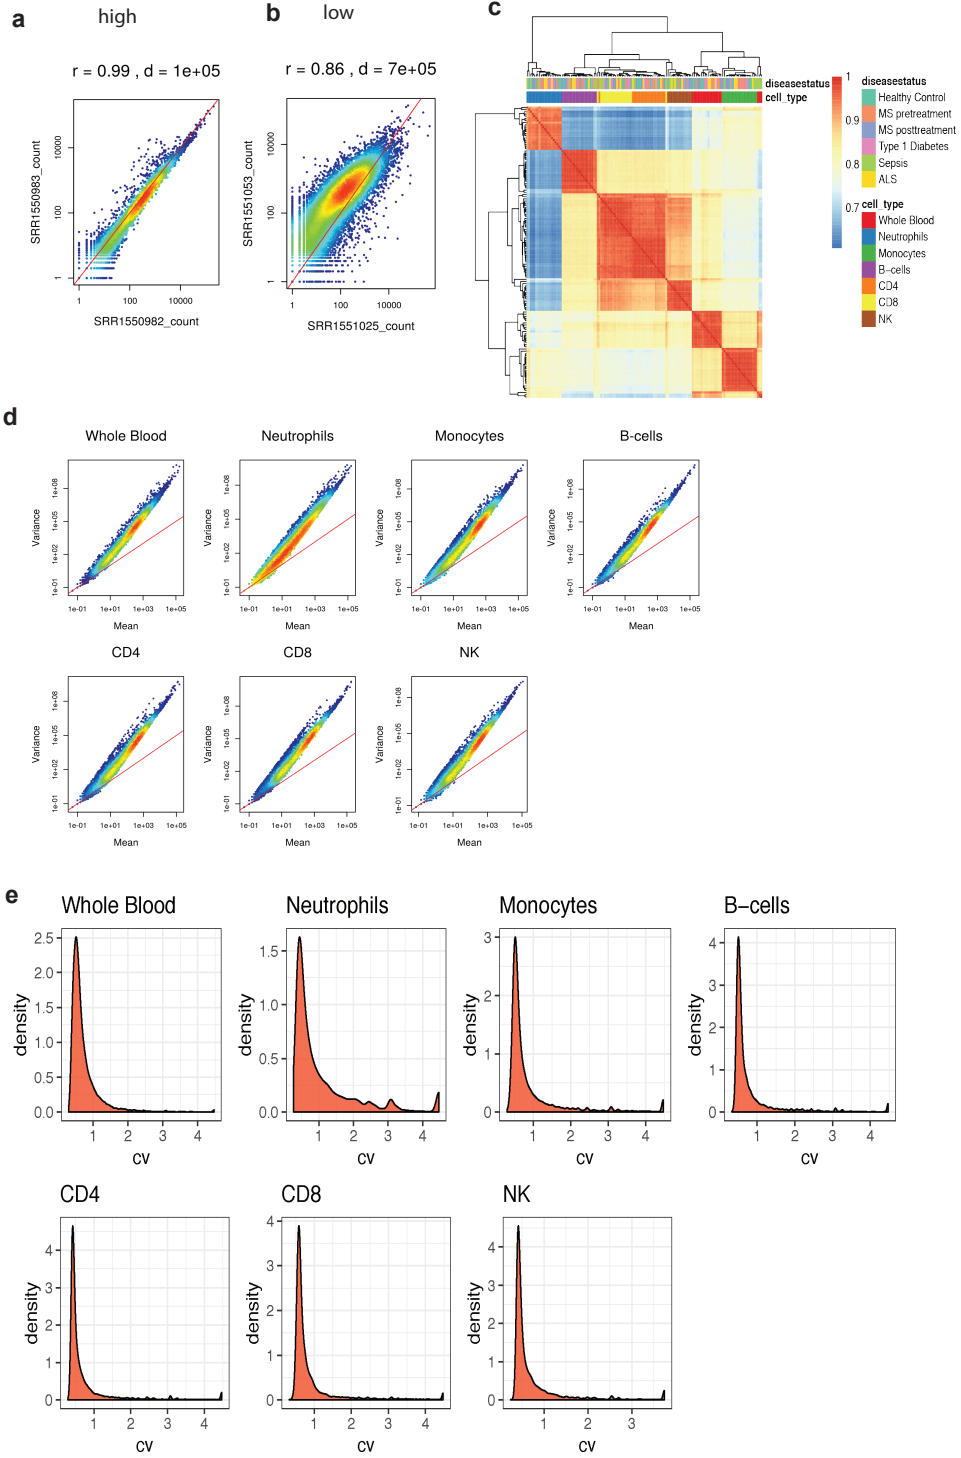

## Figure S6| Variance analysis of GSE60424

**a,b**, Scatter plots of whole blood sample profiles with **(a)** highest correlation and **(b)** lowest correlation. **c**, Correlation heatmap across all sample pairs. **d**, Mean-variance plot **e**, Density plot of CV (coefficient of variance) **r**: Spearman correlation coefficient, **d**: Euclidian distance. All points are plotted in the log space. (All results are in the count unit.)

## Variance Structure of GSE113590

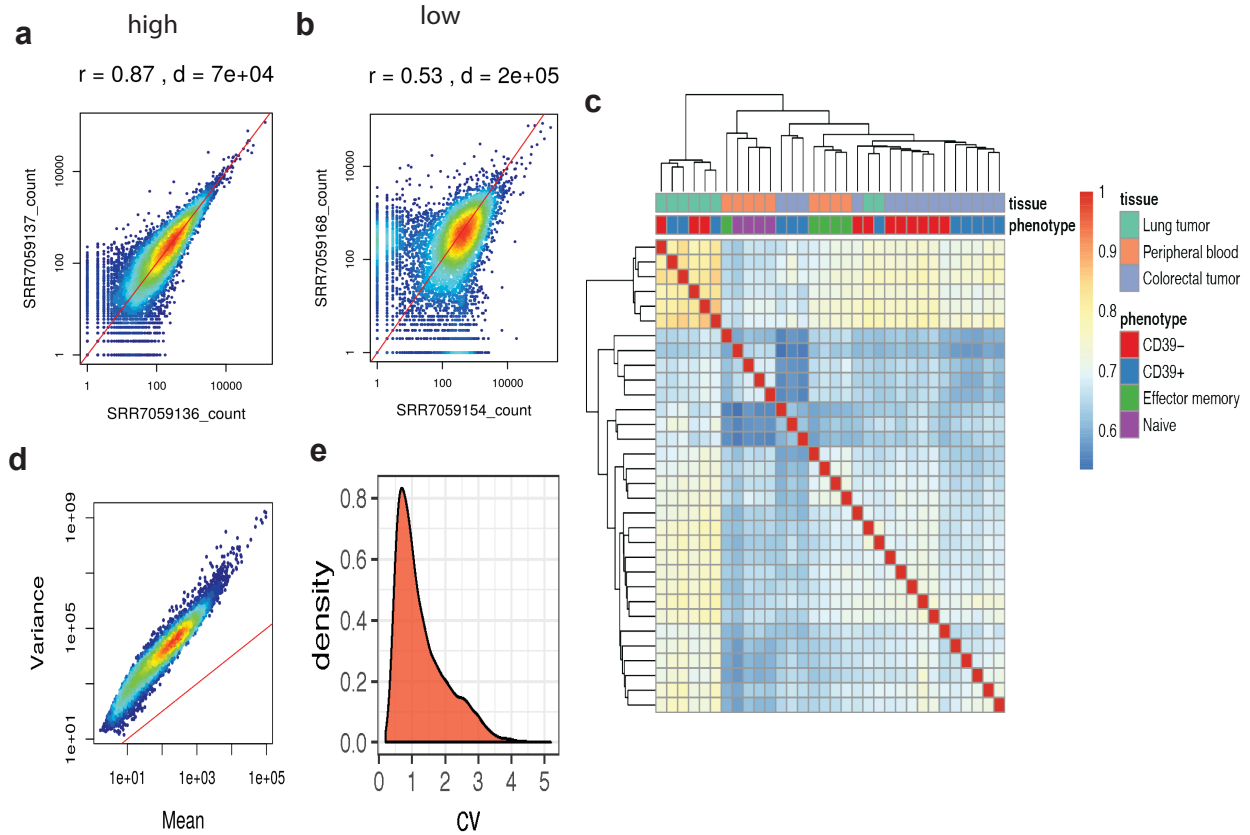

**Figure S7| Variance analysis of GSE113590**

**a,b**, Scatter plots of CD8 T sample profiles with **(a)** highest correlation and **(b)** lowest correlation. **c**, Correlation heatmap across all sample pairs. **d**, Mean-variance plot **e**, Density plot of CV (Coefficient of variance)  $r$ : Spearman correlation coefficient,  $d$ : Euclidian distance. All points are plotted in the log space. (All results are in the count unit.)

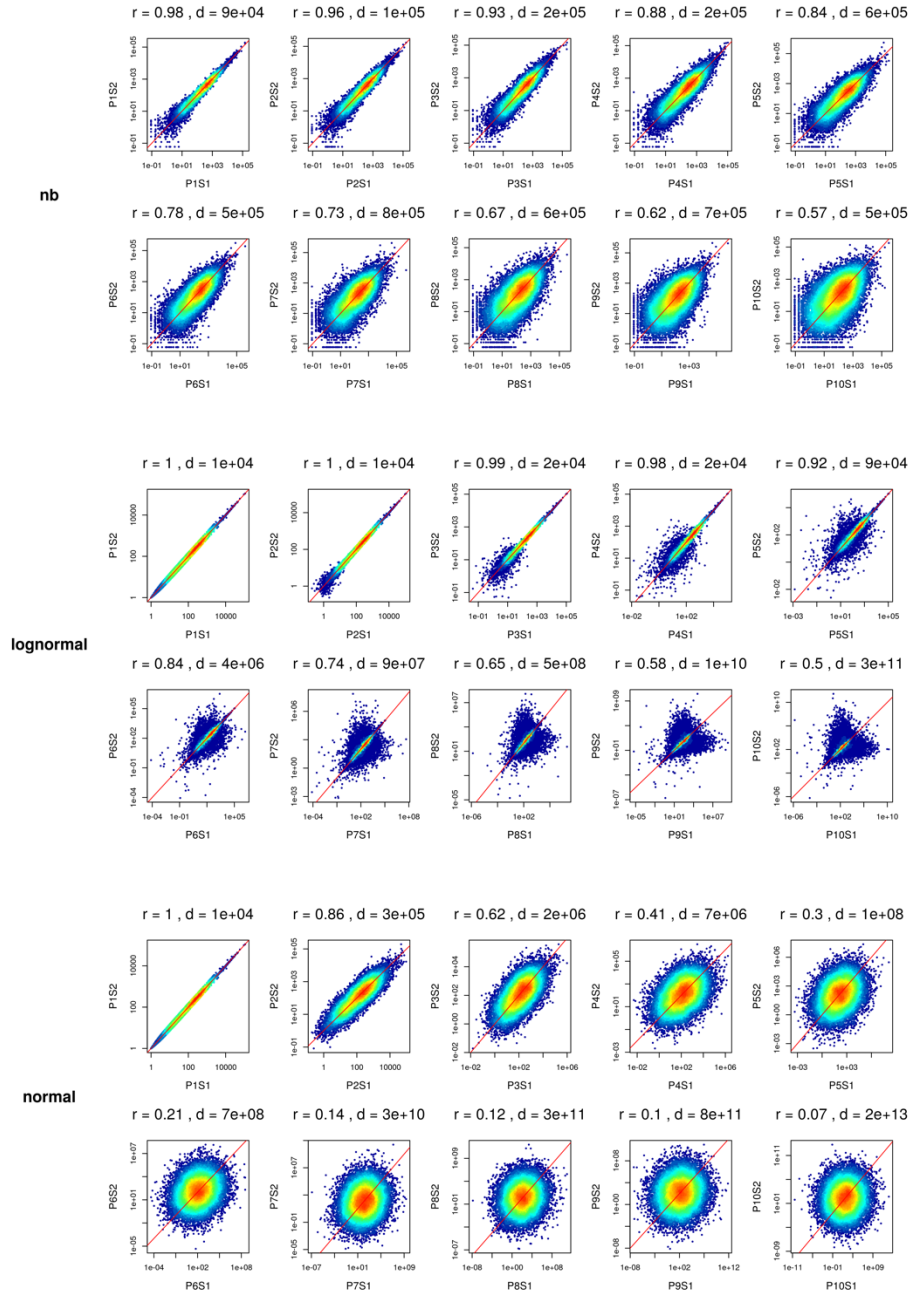

**Figure S8| Scatter plots of simulated profiles in Sim1\_simModel**

Sample-sample scatter plots of the first two simulated profiles that are derived from GSE51984. Each row panel refers to the simulation model used to generate simulation. (All results are in the count unit.)

nb

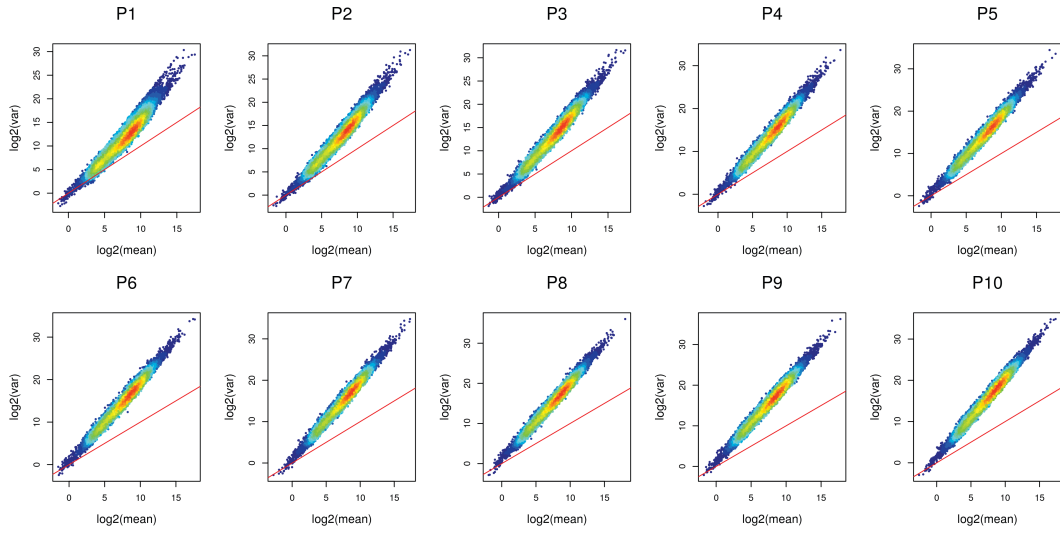

log-normal

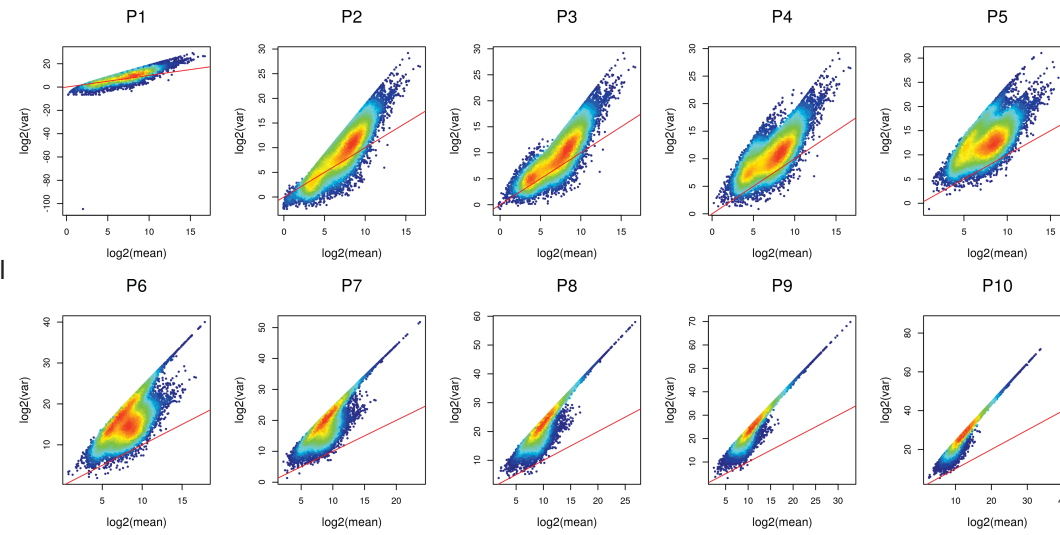

normal

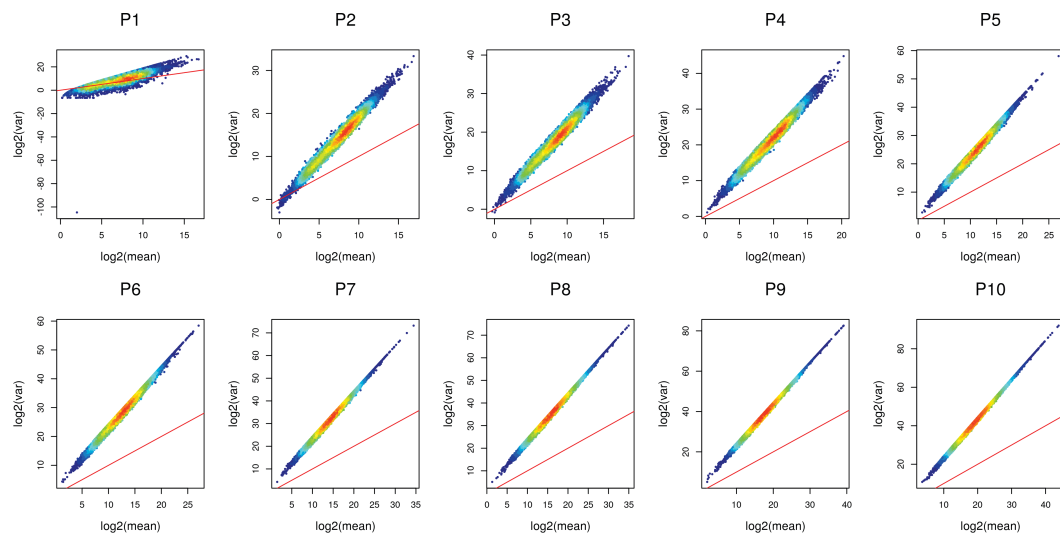

### **Figure S9| Mean-variance plots of simulations in Sim1\_simModel**

Mean-variance plots of simulations derived from negative binomial (nb), log-normal, and normal simulation models. In each simulation model, 10 plots are generated for 10 noise levels (P1–P10). The simulations in this figure are generated from GSE51984. (All results are in the count unit.)

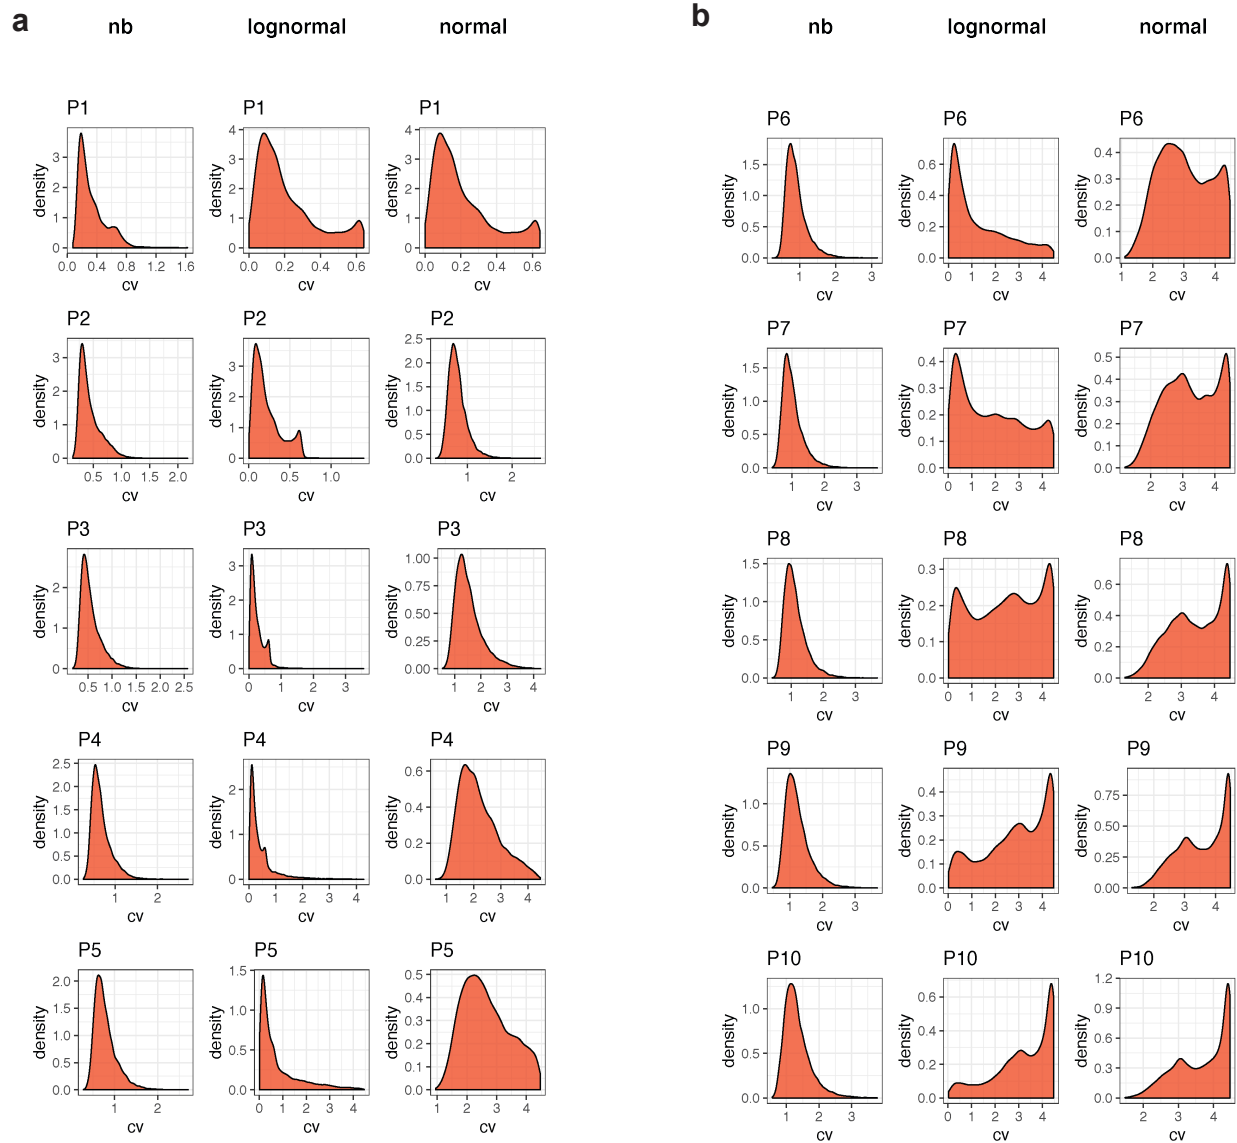

**Figure S10| Density plots of CV values in Sim1\_simModel**

**a, b**, Density curve of CV (Coefficient of variance) from 3 simulation models with noise level (a) P1 – P5 and (b), P6 – P10. The simulations in this figure are generated from GSE51984. (All results are in the count unit.)

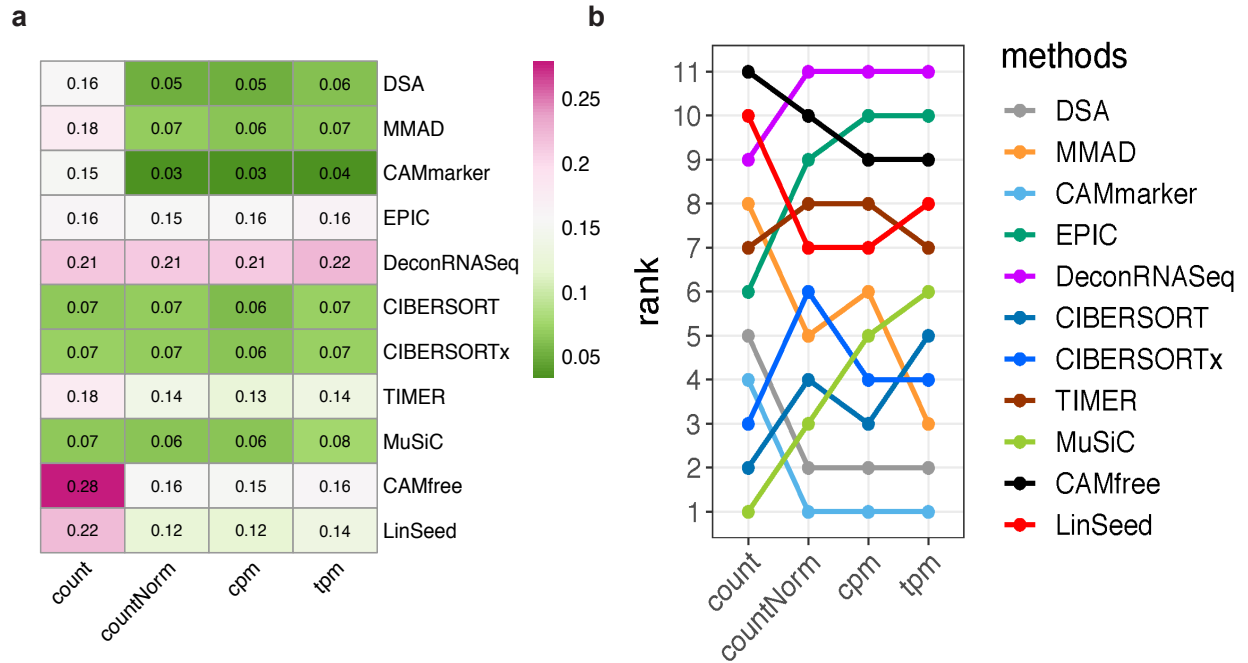

**Figure S11| Evaluation results of Sim1\_libSize based on mAD**

**a**, Heatmap of summarized evaluation results based on the mADs and **b**, rankings of tested deconvolution methods. In each heatmap, row indexes refer to the tested methods and column indexes refer to the quantification units (count, countNorm, cpm, and tpm).



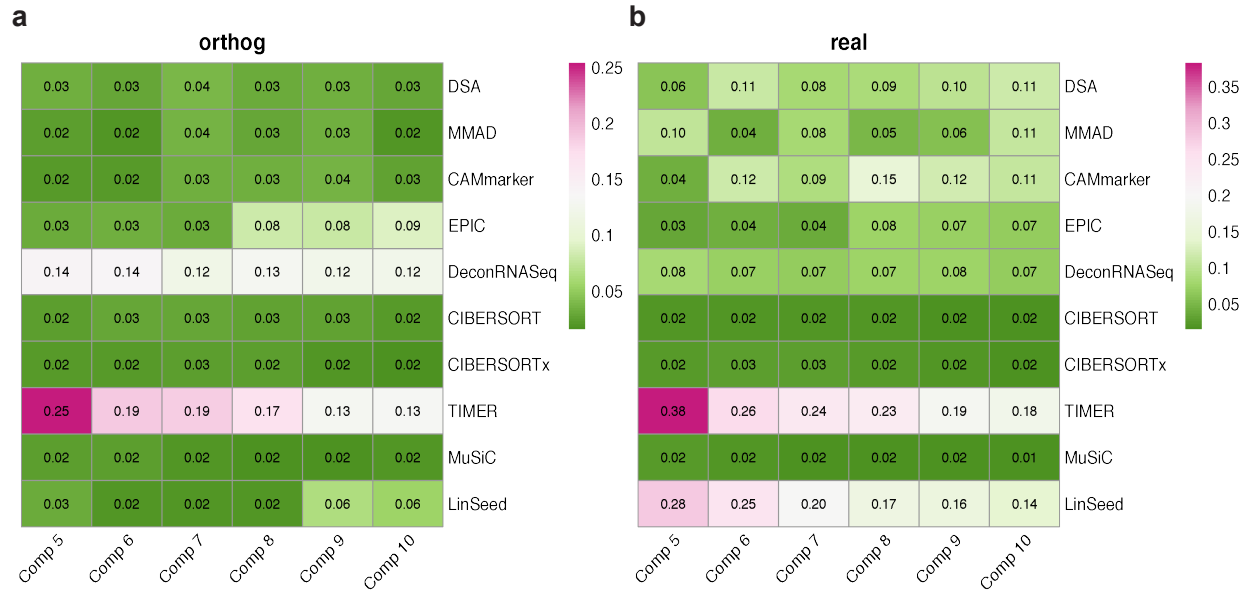

**Figure S12| Evaluation results of Sim2 based on mAD**

**a,b**, Heatmaps of summarized evaluation results based on the mAD metric with **(a)** ‘orthog’ weight matrix and **(b)** ‘real’ weight matrix. In each heatmap, row indexes refer to the tested methods and column indexes refer to the cellular component numbers.

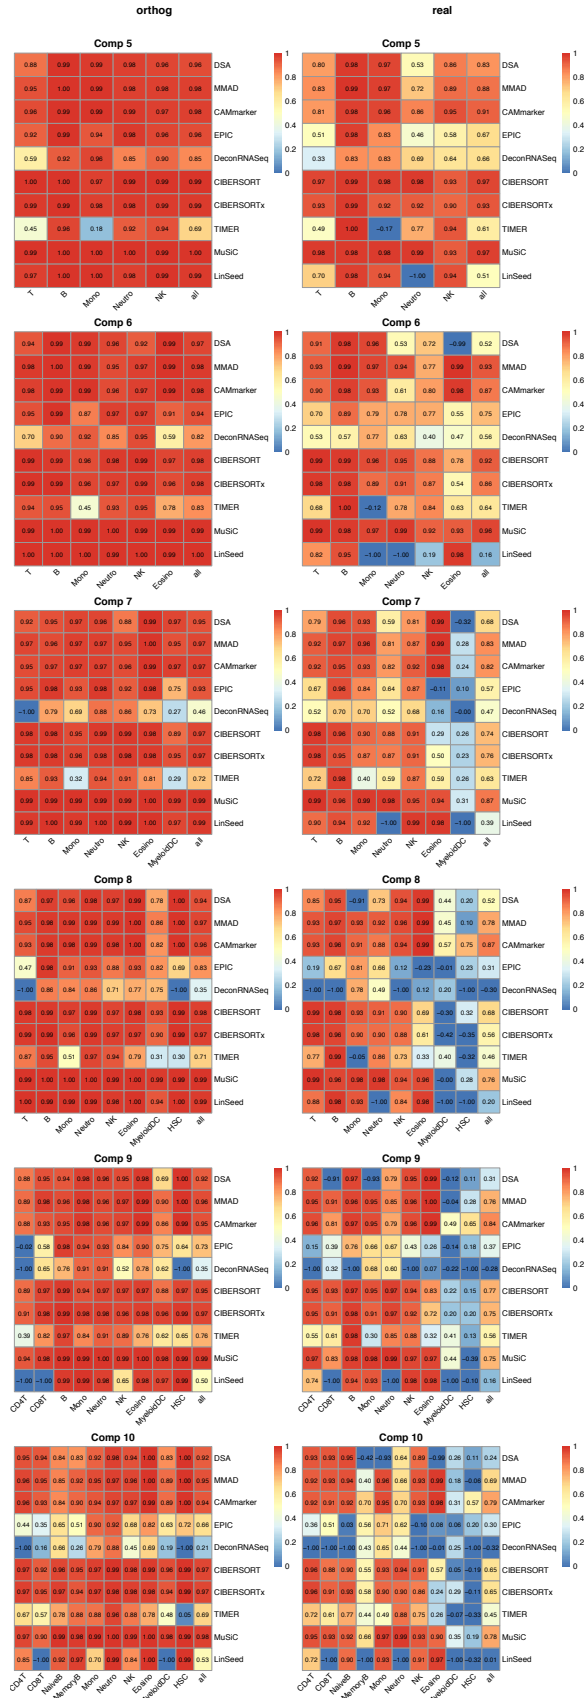

### **Figure S13| Cell-type-specific evaluation heatmaps of Sim2 based on correlation**

Evaluation results of Sim2 based on the correlation metric. Each row panel indicates the number of cellular components in the mixture and each column panel indicates the weight matrix type ('orthog' vs. 'real'). In each heatmap, row indexes refer to the tested methods, column indexes refer to the cell types, and the last column 'all' refers to the averaged evaluation results across all cell types.

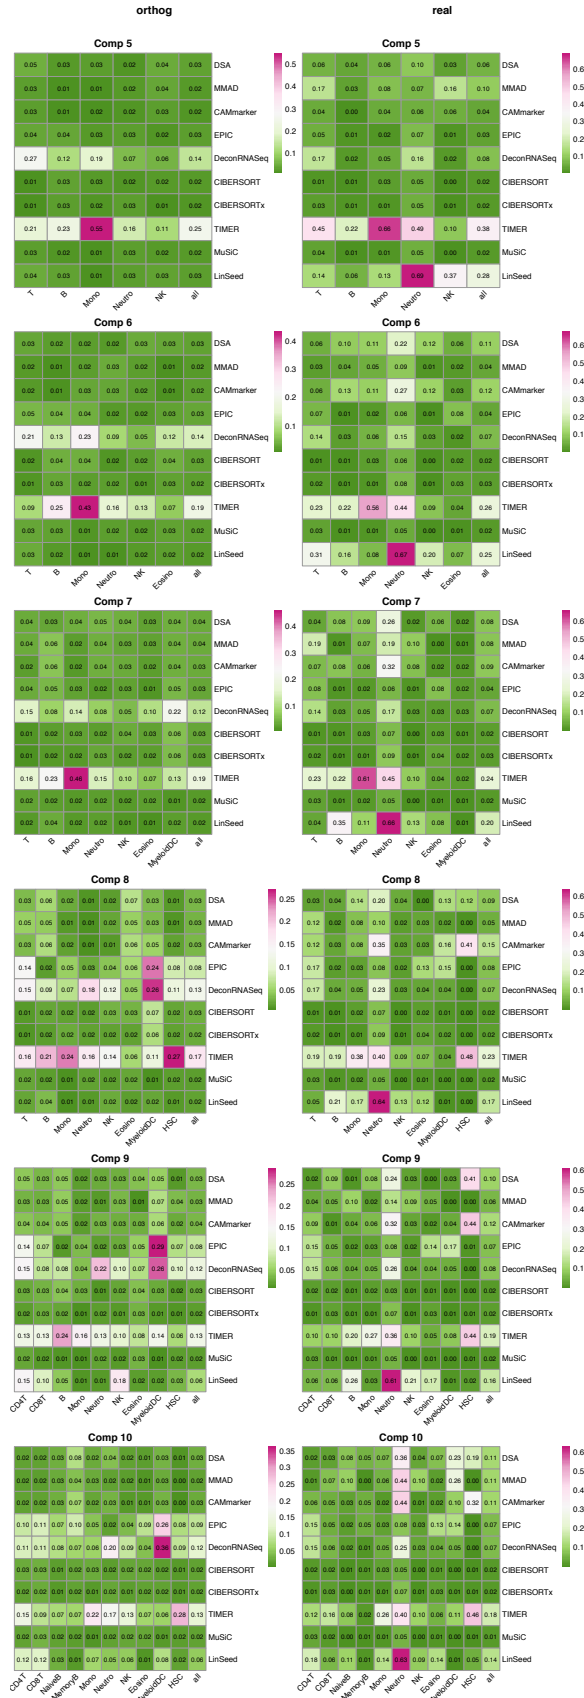

### **Figure S14| Cell-type-specific evaluation heatmaps of Sim2 based on mAD**

Evaluation results of Sim2 based on the mAD metric. Each row panel indicates the number of cellular components in the mixture and each column panel indicates the weight matrix type ('orthog' vs. 'real'). In each heatmap, row indexes refer to the tested methods, column indexes refer to the cell types, and the last column 'all' refers to the averaged evaluation results across all cell types.

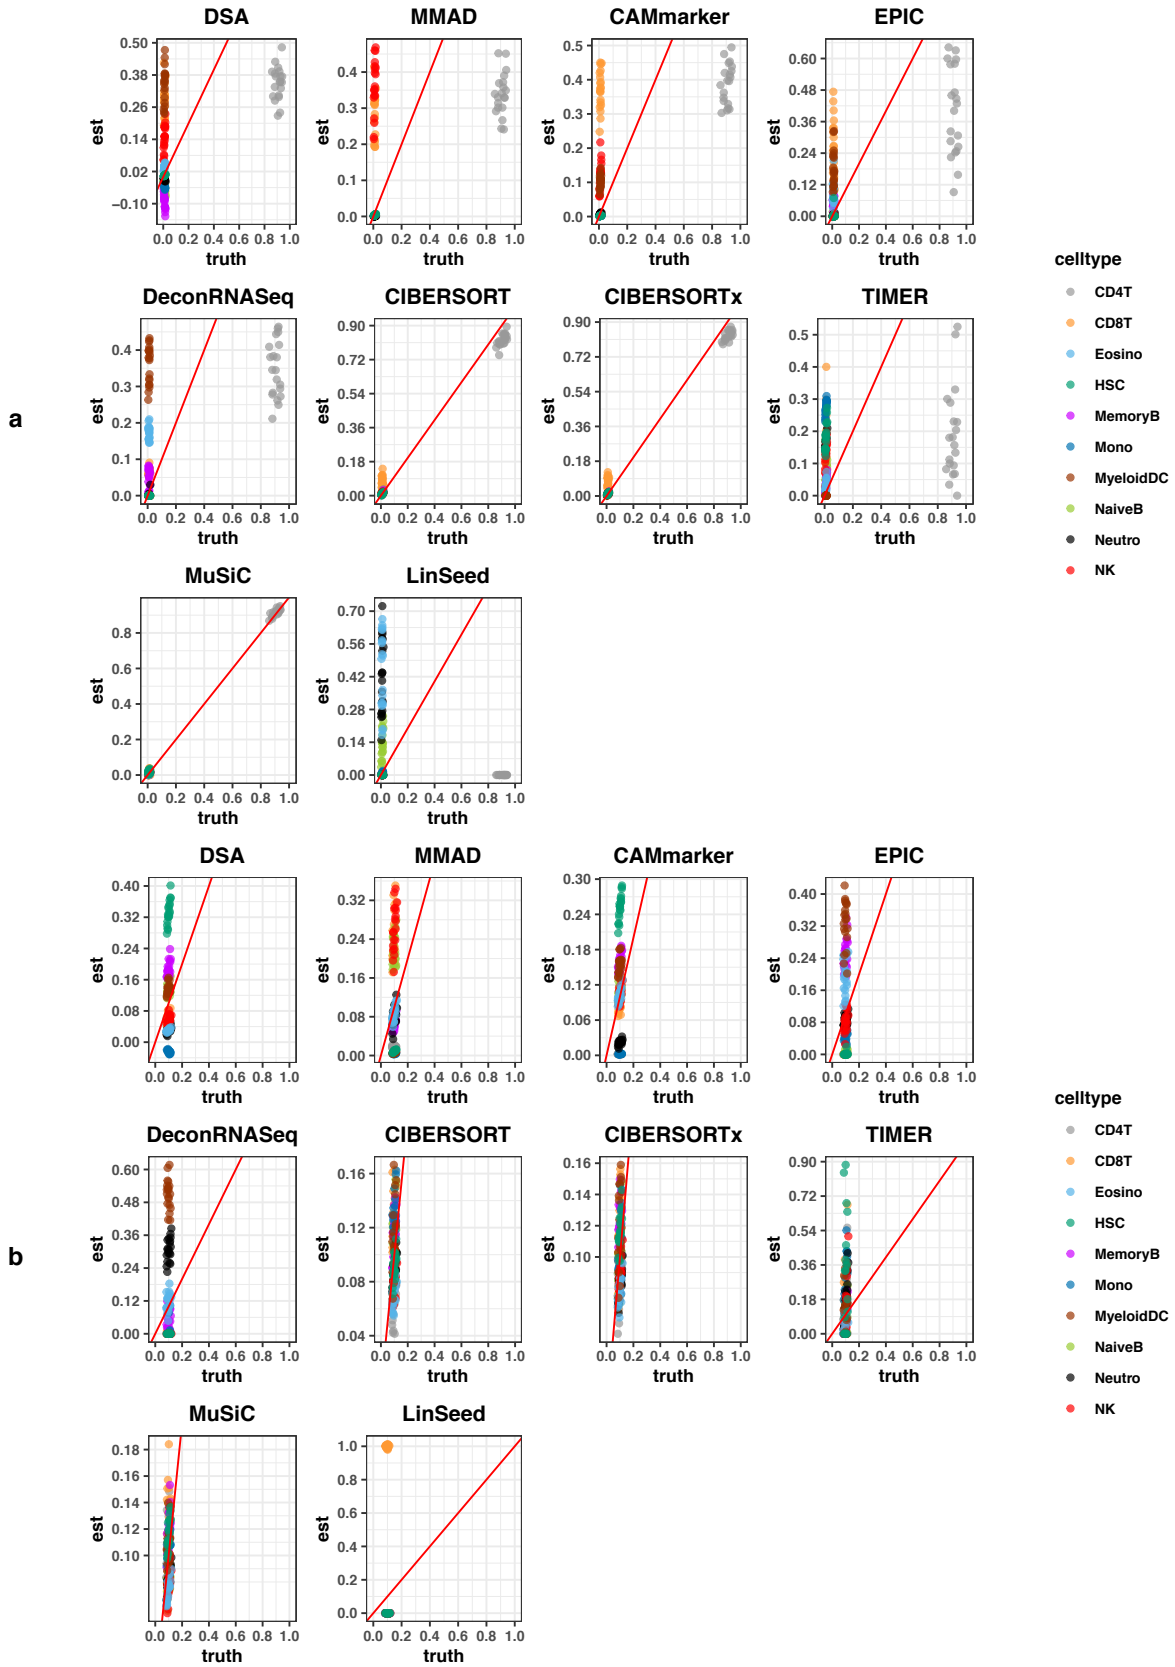

**Figure S15| Scatter plots of estimated weights vs. ground truths of mixtures with 10 cellular components. a, Mixture sets with ‘dominant’ weight matrix . b, Mixture sets with ‘uniform’ weight matrix. For more detail of weight matrix construction, please refer to the Method section.**

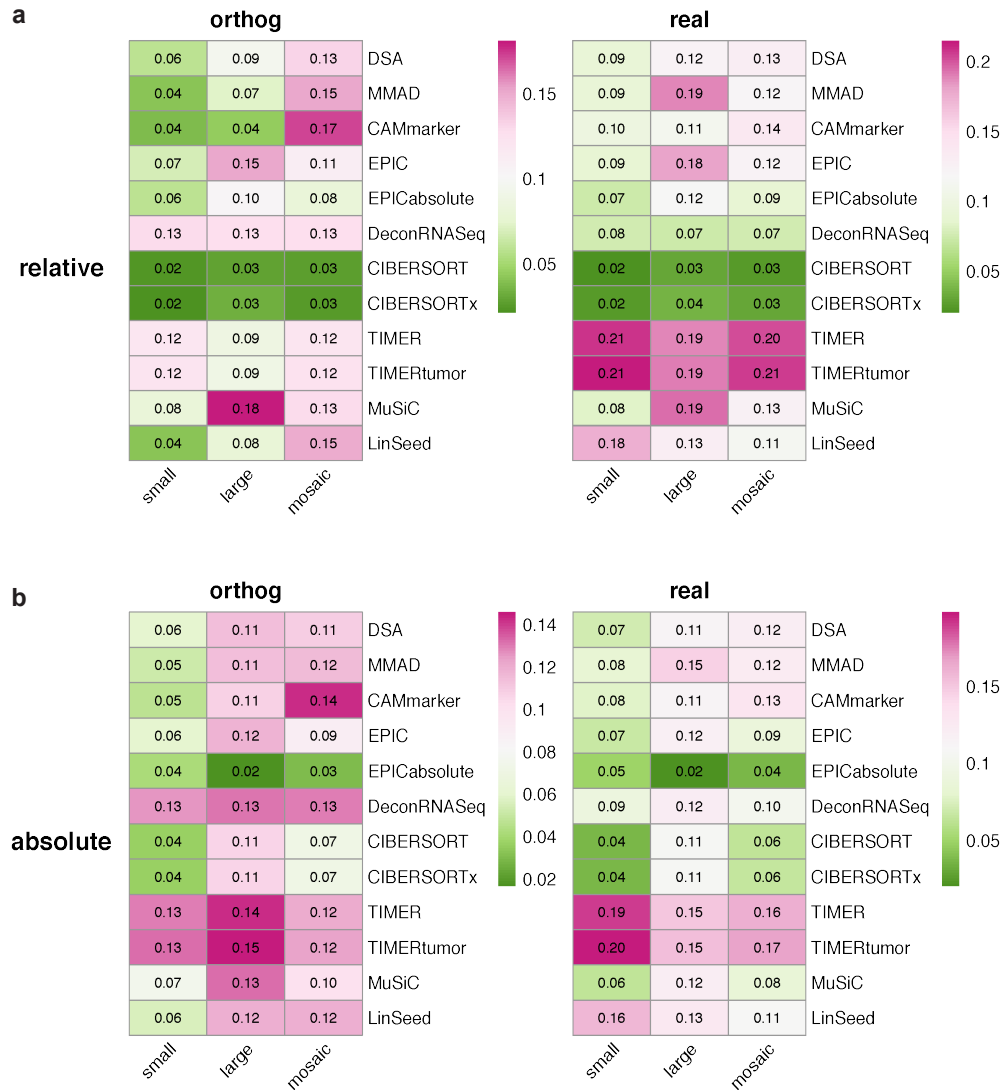

**Figure S16| Summarized mAD heatmaps of Sim3**

**a,b**, Heatmaps of summarized evaluation metric based on mAD evaluation metric with (a) relative measurement scale and (b) absolute measurement scale. In each heatmap, row indexes refer to the tested methods, and column indexes refer to the types of tumor spike-ins (small, large, and mosaic).



a

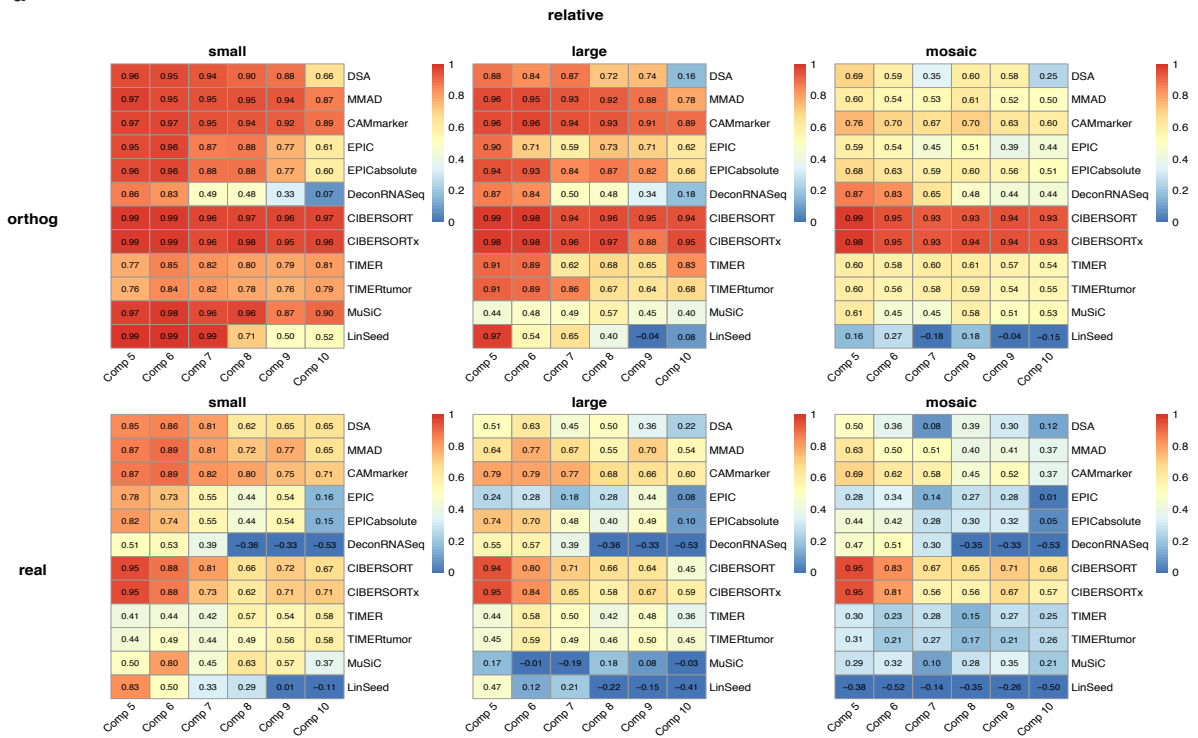

b

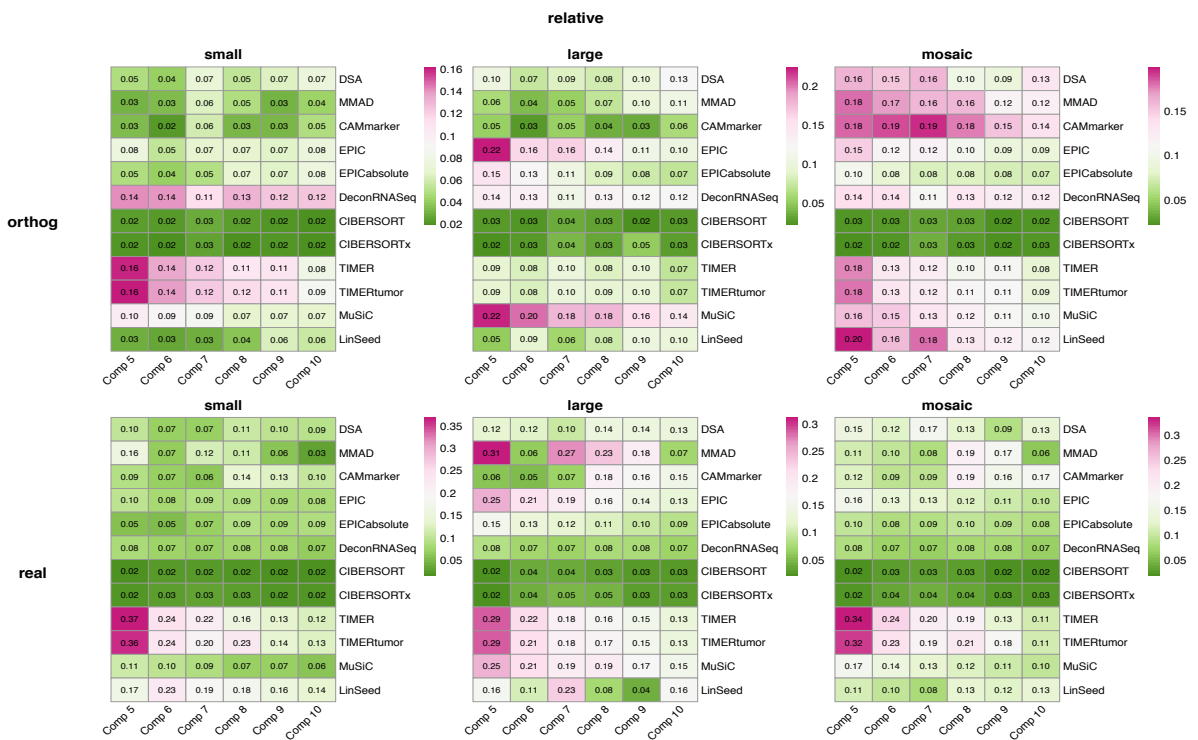

**Figure S17| Summarized evaluation heatmaps of Sim3 in the relative scale**

**a, b**, Summarized evaluation heatmap based on **(a)** Pearson's correlation coefficients and **(b)** mAD. The row panel indicates the type of weight matrix and the column panel indicates the type of tumor spike-ins (small, large, and mosaic). In each heatmap, row indexes refer to the tested methods and column indexes refer to the number of cellular components in the mixture.

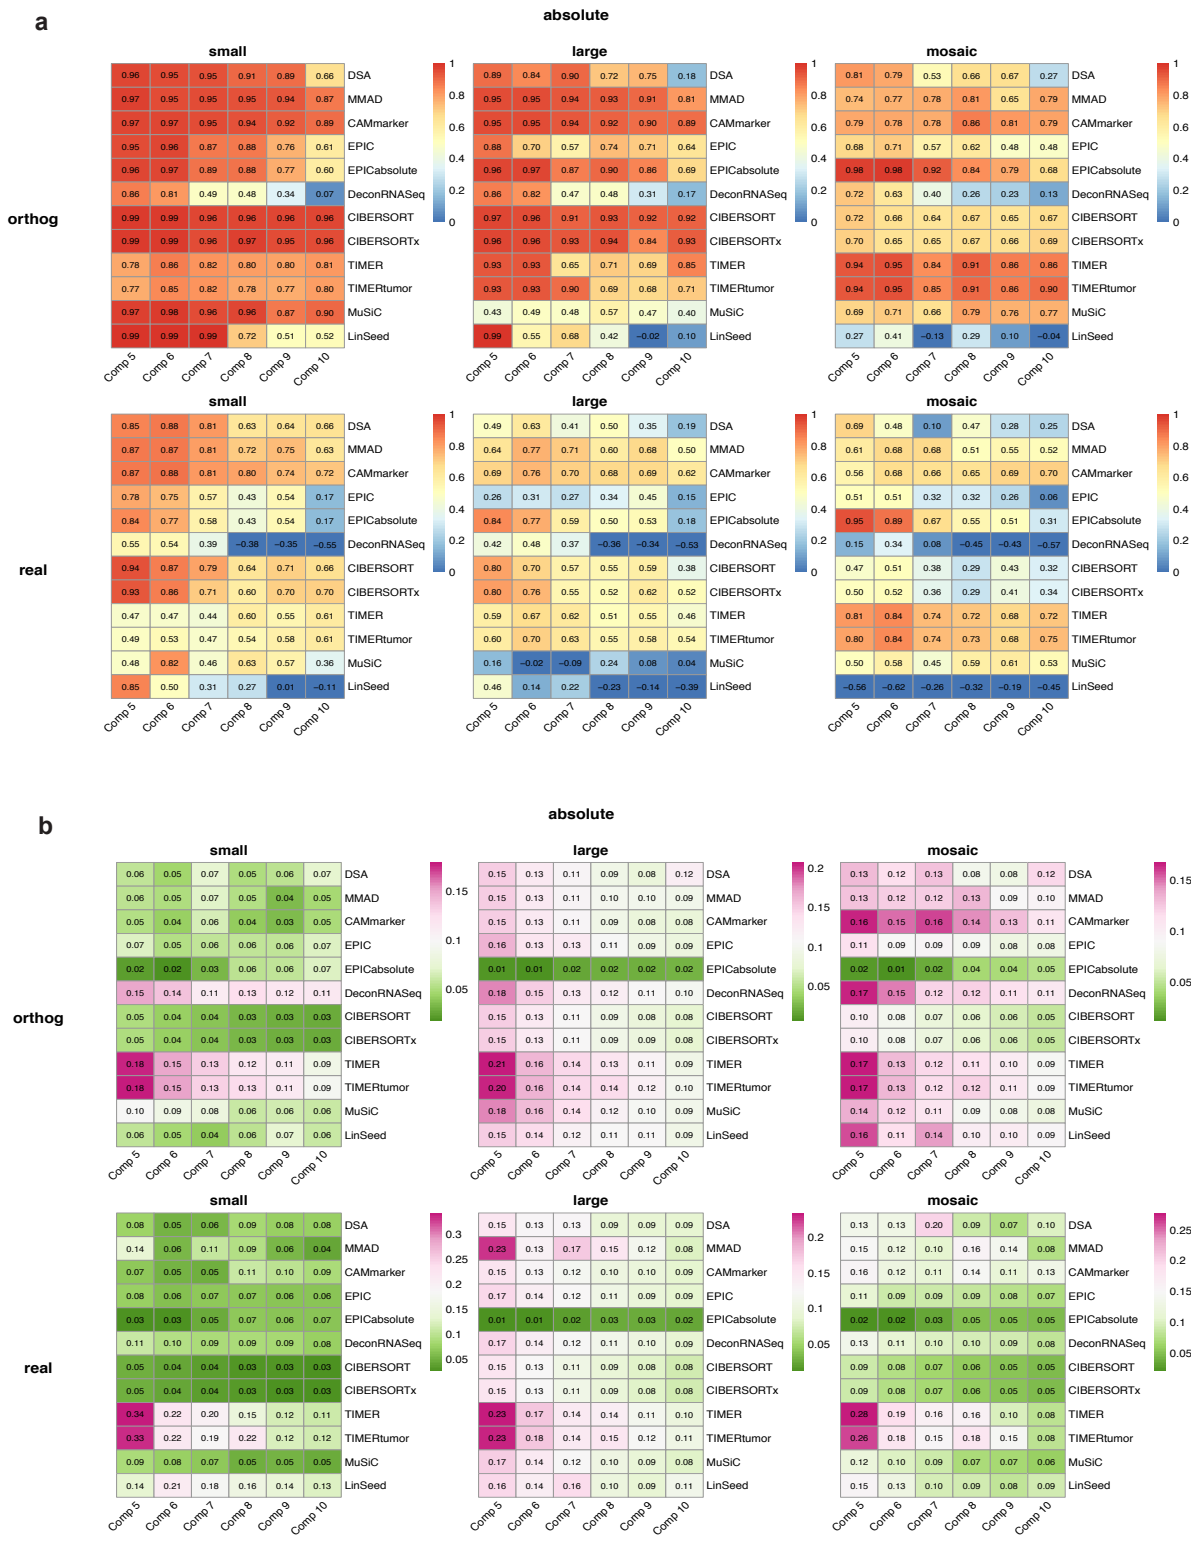

**Figure S18| Summarized evaluation heatmaps of Sim3 in the absolute scale**

**a, b**, Summarized evaluation heatmap based on **(a)** Pearson's correlation coefficients and **(b)** mAD. The row panel indicates the type of weight matrix and the column panel indicates tumor spike-ins (small, large, and mosaic). In each heatmap, row indexes refer to the tested methods and column indexes refer to the number of cellular components in the mixture.
