# Supplementary material for: A benchmark for RNA-seq deconvolution analysis under dynamic testing environments
Source: PubMed Central journal article supplement (PMC8042713; doi:10.1186/s13059-021-02290-6), 2021-04-12
Supplement: 13059_2021_2290_MOESM2_ESM.pdf [file 13059_2021_2290_MOESM2_ESM.pdf]

## **Supplementary Tables**

Table S1 - Three benchmarking frameworks commonly applied

Table S2 – Technical and biological factors studied in each benchmarking framework

Table S3 – Deconvolution methods tested in this study

Table S4 – A toy example of absolute and relative measurement scales

**Table S1: Three benchmarking frameworks commonly applied**

| <b>Framework type</b> | <b>Sample source</b>            | <b>Ground truth</b> | <b>Flexibility</b> | <b>Cost-effectiveness</b> | <b>Similarity to the biological condition</b> |
|-----------------------|---------------------------------|---------------------|--------------------|---------------------------|-----------------------------------------------|
| <i>in silico</i>      | simulation                      | yes                 | High               | High                      | Low                                           |
| <i>in vitro</i>       | experimentally<br>mixed samples | yes                 | Medium             | Medium                    | Medium                                        |
| <i>in vivo</i>        | biological specimen             | Usually no          | Low                | Low                       | High                                          |

**Table S2: Factors studied in three benchmarking frameworks**

| Benchmarking frameworks                                                                                                                                                                                                                                                                                                                                                                                                                | Factor 1         | Factor 2          | Factor 3            | Factor 4         | Factor 5 | Number of conditions | Dataset index                                                  |
|----------------------------------------------------------------------------------------------------------------------------------------------------------------------------------------------------------------------------------------------------------------------------------------------------------------------------------------------------------------------------------------------------------------------------------------|------------------|-------------------|---------------------|------------------|----------|----------------------|----------------------------------------------------------------|
| Sim1_simModel                                                                                                                                                                                                                                                                                                                                                                                                                          | Simulation model | Noise level       | Other noise sources | Units            |          | 1080                 | 1,3 and 4                                                      |
| Sim1_libSize                                                                                                                                                                                                                                                                                                                                                                                                                           | Units            | Noise level       | Other noise sources |                  |          | 360                  | 1,3 and 4                                                      |
| Sim2                                                                                                                                                                                                                                                                                                                                                                                                                                   | Weight matrix    | Component number  | Units               |                  |          | 48                   | 1,3,4 and 5                                                    |
| Sim3                                                                                                                                                                                                                                                                                                                                                                                                                                   | Tumor content    | Measurement scale | Weight matrix       | Component number | Units    | 288                  | 1,3,4,5 and 6                                                  |
| Total number of conditions: 1, 776                                                                                                                                                                                                                                                                                                                                                                                                     |                  |                   |                     |                  |          |                      | Data index corresponds to the index in the dataset description |
| <p><b>Summary of factors:</b></p> <p>Simulation model: 3 (normal, log-normal, and nb)</p> <p>Noise level: 10 (P1-P10)</p> <p>Units: 4 (count, countNorm, cpm, and tpm)</p> <p>Weight matrix: 2 (orthog and real)</p> <p>Component number: 6 (5 - 10)</p> <p>Tumor content: 3 (small, large, and mosaic)</p> <p>Measurement scale: 2 (relative and absolute)</p> <p>Other noise sources: 9 (variance between reference and mixture)</p> |                  |                   |                     |                  |          |                      |                                                                |

**Table S3: Methods tested in this study**

| Deconvolution methods                                                                                                                                                                                                                                                                                                                                                                                                                                                                                                                                              | Description                            | Type            |
|--------------------------------------------------------------------------------------------------------------------------------------------------------------------------------------------------------------------------------------------------------------------------------------------------------------------------------------------------------------------------------------------------------------------------------------------------------------------------------------------------------------------------------------------------------------------|----------------------------------------|-----------------|
| DSA                                                                                                                                                                                                                                                                                                                                                                                                                                                                                                                                                                | Least squares or quadratic programming | Marker-based    |
| MMAD                                                                                                                                                                                                                                                                                                                                                                                                                                                                                                                                                               | Maximum likelihood                     | Marker-based    |
| CAMmarker                                                                                                                                                                                                                                                                                                                                                                                                                                                                                                                                                          | Simplex approach                       | Marker-based    |
| CIBERSORT                                                                                                                                                                                                                                                                                                                                                                                                                                                                                                                                                          | Support vector regression              | Reference-based |
| CIBERSORTx                                                                                                                                                                                                                                                                                                                                                                                                                                                                                                                                                         | Support vector regression              | Reference-based |
| EPIC                                                                                                                                                                                                                                                                                                                                                                                                                                                                                                                                                               | Weighted least squares                 | Reference-based |
| TIMER                                                                                                                                                                                                                                                                                                                                                                                                                                                                                                                                                              | Least-squares                          | Reference-based |
| DeconRNASeq                                                                                                                                                                                                                                                                                                                                                                                                                                                                                                                                                        | Least-squares                          | Reference-based |
| MuSiC                                                                                                                                                                                                                                                                                                                                                                                                                                                                                                                                                              | Iterative weighted least squares       | Reference-based |
| LinSeed                                                                                                                                                                                                                                                                                                                                                                                                                                                                                                                                                            | Simplex approach                       | Reference-free  |
| CAMfree                                                                                                                                                                                                                                                                                                                                                                                                                                                                                                                                                            | Simplex approach                       | Reference-free  |
| <p>Additional information:</p> <p>We had to make some modifications to the name of some methods as we used different parameter settings for the same method.</p> <ol style="list-style-type: none"><li>1. CAMmarker and CAMfree are all derived from R package CAMTHC. We named the marker-based approach CAMmarker and the reference-free approach CAMfree.</li><li>2. We referred EPIC with the unknown content estimation as EPICabsolute.</li><li>3. We referred TIMER with the additional filtering process specific for tumor genes as TIMERTumor.</li></ol> |                                        |                 |

**Table S4: A toy example of absolute and relative measurement scales**

|                        | T cell            | B cell            | Unknown contents | Sum |
|------------------------|-------------------|-------------------|------------------|-----|
| Absolute scale weights | 0.3               | 0.2               | 0.5              | 1   |
| Relative scale weights | $0.3/(0.5) = 0.6$ | $0.2/(0.5) = 0.4$ | /                | 1   |
