# Supplementary material for: A benchmark for RNA-seq deconvolution analysis under dynamic testing environments
Source: PubMed Central journal article supplement (PMC8042713; doi:10.1186/s13059-021-02290-6), 2021-04-12
Supplement: 13059_2021_2290_MOESM3_ESM.pdf [file 13059_2021_2290_MOESM3_ESM.pdf]

## **Datasets description:**

- 1. GSE60424** - Consists of 134 RNA-seq profiles of 6 immune cell types and whole blood from both healthy donors and donors with five immune-associated diseases.
- 2. GSE113590** - Consists of 32 CD8 T cell RNA-seq profiles from peripheral blood, colorectal tumor samples, and lung tumor samples.
- 3. GSE64655** - Consists of 56 RNA-seq profiles of 6 immune cell types and peripheral blood from two vaccinated donors.
- 4. GSE51984** - Consists of 24 RNA-seq profiles of 5 immune cell types and total white blood cells from healthy donors
- 5. GSE115736** - Consists of 42 RNA-seq profiles of 12 immune cell types from healthy donors.
- 6. GSE118490** - HCT116 profiles (unknown tumor content in Sim3)
